# Supplementary material for: In Vitro Bioaccessibility of Extractable Compounds from Tannat Grape Skin Possessing Health Promoting Properties with Potential to Reduce the Risk of Diabetes
Source: PubMed Central journal article supplement (PMC7692155; doi:10.3390/foods9111575), 2020-10-30
Supplement: foods-09-01575-s001.pdf [file foods-09-01575-s001.pdf]

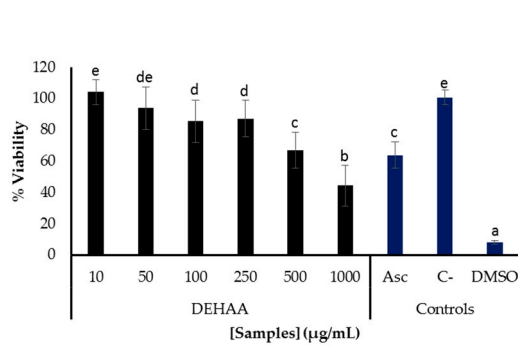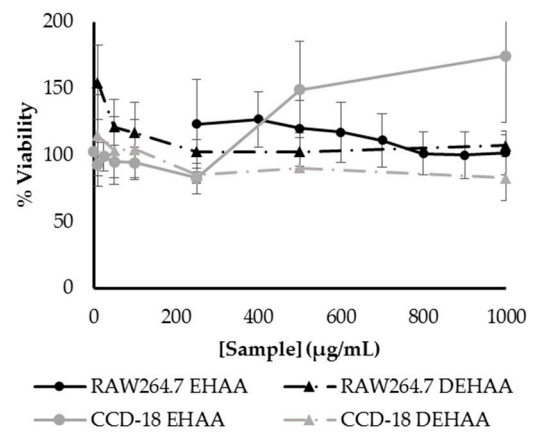

(a)

(b)

**Figure S1.** Cell viability of (a) IEC-6, (b) CCD-18Co and RAW264.7 cells by MTT assay. Hydroalcoholic-acid extract (EHAA) and its digestion (DEHAA) were tested. Negative control (C-), medium without FBS and DMSO 50 %, was the positive control. Bars and error bars represent the mean values and standard deviation, respectively. Different letters state significant differences by Tukey test ( $p < 0.05$ ).

**Table S1.** Tannat grape skin hydro-alcoholic-acid extract bioactive properties on cellular models.

| Extract<br>( $\mu\text{g/mL}$ )                    | Assays                                                                                    |                                   |                                   |
|----------------------------------------------------|-------------------------------------------------------------------------------------------|-----------------------------------|-----------------------------------|
|                                                    | <i>Antioxidant properties</i>                                                             |                                   |                                   |
| Intracellular ROS formation in CCD-18Co cells (%)  |                                                                                           |                                   |                                   |
|                                                    | Physiological conditions                                                                  | Induced by t-BOOH (1 mM)          |                                   |
|                                                    |                                                                                           | Prevention                        | Prevention with co-administration |
| 0                                                  | 100.0 $\pm$ 6.3 <sup>cA</sup>                                                             | 151.0 $\pm$ 12.7 <sup>cB</sup>    | 178.0 $\pm$ 7.0 <sup>cC</sup>     |
| 100                                                | 41.5 $\pm$ 8.4 <sup>bA</sup>                                                              | 94.5 $\pm$ 16.8 <sup>abB</sup>    | 115.8 $\pm$ 11.9 <sup>bC</sup>    |
| 250                                                | 27.4 $\pm$ 6.4 <sup>aA</sup>                                                              | 78.8 $\pm$ 13.1 <sup>aB</sup>     | 96.8 $\pm$ 9.0 <sup>bC</sup>      |
| 500                                                | 24.6 $\pm$ 8.6 <sup>aA</sup>                                                              | 96.2 $\pm$ 9.0 <sup>abC</sup>     | 65.5 $\pm$ 16.2 <sup>aB</sup>     |
| 1000                                               | 24.4 $\pm$ 7.7 <sup>aA</sup>                                                              | 113.6 $\pm$ 26.6 <sup>bC</sup>    | 59.7 $\pm$ 16.3 <sup>aB</sup>     |
| Intracellular ROS formation in RAW 264.7 cells (%) |                                                                                           |                                   |                                   |
|                                                    | Physiological conditions                                                                  | Induced by t-BOOH (1 mM)          |                                   |
|                                                    |                                                                                           | Prevention                        | Prevention with co-administration |
| 0                                                  | 100.0 $\pm$ 8.3 <sup>cA</sup>                                                             | 211.4 $\pm$ 44.4 <sup>bB</sup>    | 211.4 $\pm$ 44.4 <sup>bB</sup>    |
| 100                                                | 38.9 $\pm$ 8.3 <sup>bA</sup>                                                              | 203.7 $\pm$ 23.6 <sup>abB</sup>   | 59.0 $\pm$ 11.2 <sup>aA</sup>     |
| 250                                                | 18.0 $\pm$ 2.9 <sup>aA</sup>                                                              | 167.7 $\pm$ 20.0 <sup>bC</sup>    | 44.2 $\pm$ 11.1 <sup>aB</sup>     |
| 500                                                | 13.0 $\pm$ 2.7 <sup>aA</sup>                                                              | 158.7 $\pm$ 26.8 <sup>bC</sup>    | 38.3 $\pm$ 12.3 <sup>aB</sup>     |
| 1000                                               | 14.3 $\pm$ 3.8 <sup>aA</sup>                                                              | 176.6 $\pm$ 10.8 <sup>bB</sup>    | 23.6 $\pm$ 1.6 <sup>aA</sup>      |
| <i>Anti-inflammatory properties</i>                |                                                                                           |                                   |                                   |
|                                                    | ( $\mu\text{g/mL}$ of NO formation in RAW 264.7 cells induced by LPS 1 $\mu\text{g/mL}$ ) |                                   |                                   |
|                                                    | Prevention                                                                                | Prevention with co-administration |                                   |
| 0                                                  | 9.9 $\pm$ 0.8 <sup>dA</sup>                                                               | 9.9 $\pm$ 0.8 <sup>cA</sup>       |                                   |
| 250                                                | 8.3 $\pm$ 0.7 <sup>cA</sup>                                                               | 9.6 $\pm$ 0.9 <sup>cB</sup>       |                                   |
| 500                                                | 5.8 $\pm$ 0.7 <sup>bA</sup>                                                               | 7.6 $\pm$ 0.2 <sup>bB</sup>       |                                   |
| 800                                                | 2.9 $\pm$ 0.5 <sup>aA</sup>                                                               | 2.4 $\pm$ 0.3 <sup>aA</sup>       |                                   |
| 1000                                               | 2.4 $\pm$ 0.4 <sup>aA</sup>                                                               | 2.7 $\pm$ 0.3 <sup>aA</sup>       |                                   |

Results are expressed as mean values  $\pm$  SD (n=3). Different letters indicate significant differences (Tukey test,  $p < 0.05$ ) between values in the same column (in lower case) or in the same row (capital letters). All determinations were performed in triplicate in three different cell passages.
